# Supplementary material for: Polymer Membrane Modified with Photocatalytic and Plasmonic Nanoparticles for Self-Cleaning Filters
Source: MDPI journal article supplement (doi:10.3390/polym15030726), 2023-01-31
Supplement: s1 [file s1]

Supplementary Information

# Polymer Membrane Modified with Photocatalytic and Plasmonic Nanoparticles for Self-Cleaning Filters

Aliaksandr Burko <sup>1,2</sup>, Siarhei Zavatski <sup>1,2</sup>, Arina Baturova <sup>1,2</sup>, Makhina Kholiboeva <sup>1</sup>, Julia Kozina <sup>1</sup>, Kseniya Kravtsunova <sup>3</sup>, Vladimir Popov <sup>1,2</sup>, Artem Gudok <sup>1</sup>, Sergey Dubkov <sup>2</sup>, Stanislav Khartov <sup>4</sup> and Hanna Bandarenka <sup>1,2,\*</sup>

<sup>1</sup> Applied Plasmonic Laboratory, Belarusian State University of Informatics and Radioelectronics, 220013 Minsk, Belarus

<sup>2</sup> Institute of Advanced Materials and Technologies, National Research University of Electronic Technology, Moscow 124498, Russia

<sup>3</sup> Department of General and Applied Physics, Moscow Institute of Physics and Technology, Moscow 141701, Russia

<sup>4</sup> Federal Research Center «Krasnoyarsk Scientific Center», Siberian Branch, Russian Academy of Sciences, Moscow 119991, Russia

\* Correspondence: h.bandarenka@bsuir.by

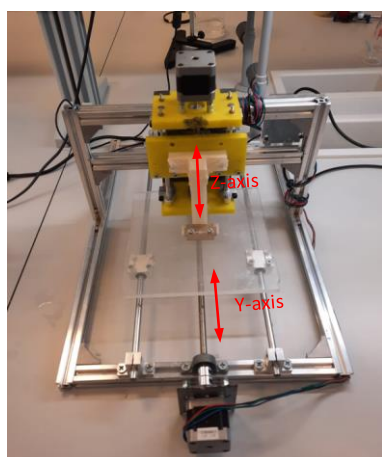

(a)

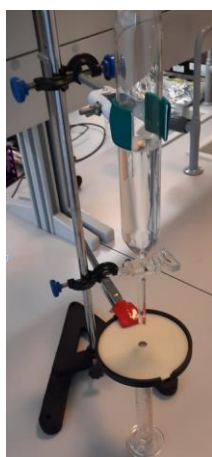

(b)

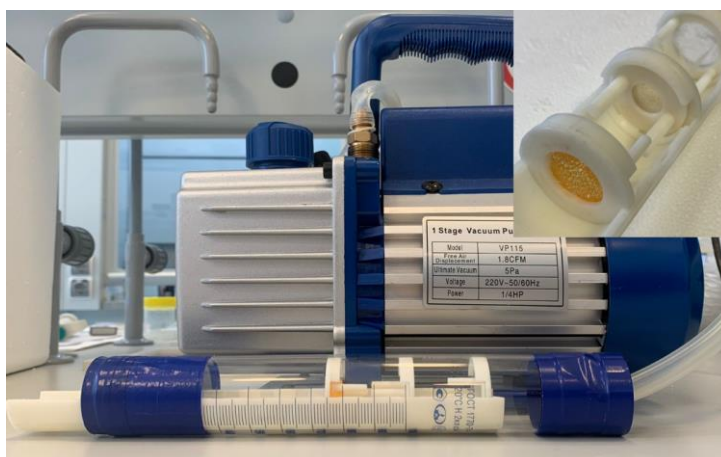

(c)

**Figure S1.** The systems for the formation and testing the experimental samples: (a) the Dr. Blade machine for formation of the polymer membrane, (b) the permeability testing system and (c) the airflow system.

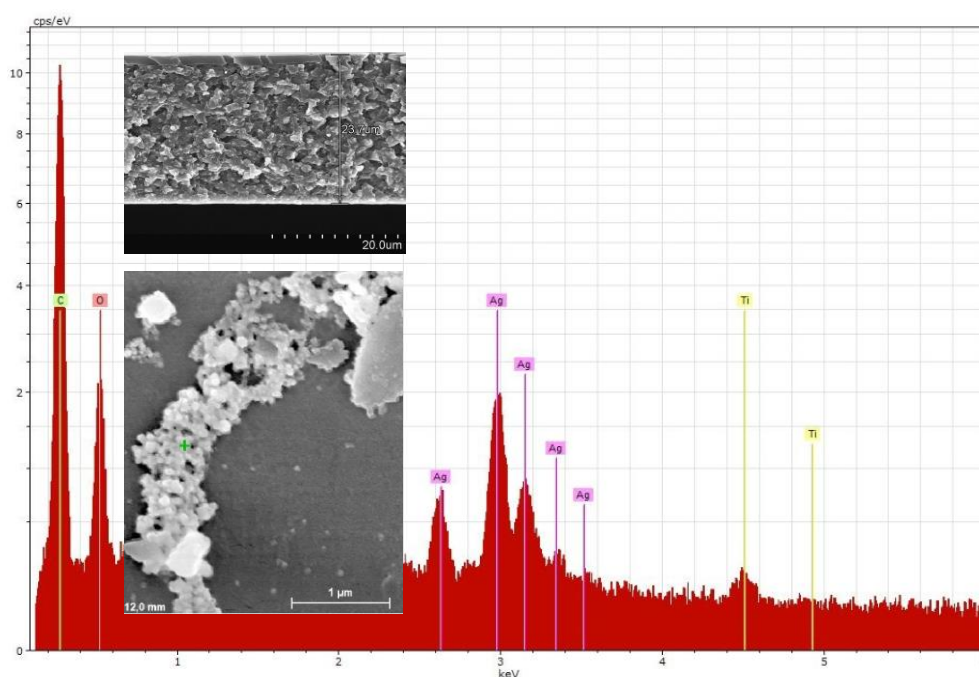

**Figure S2.** EDX spectrum and SEM images of the polymer membrane after Ag/TiO<sub>2</sub> spraying.

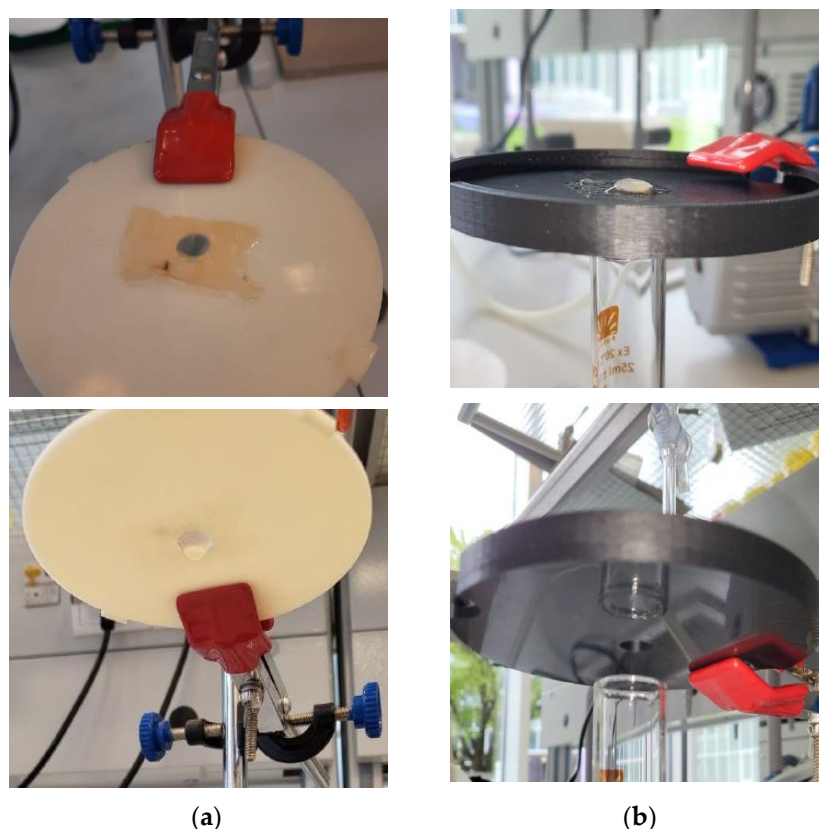

**Figure S3.** Experiments on the permeability of the TiO<sub>2</sub>/Ag/polymer membrane to the Ag particles with 100 nm diameters showing that in contrast to (a) pure water (b) the silver-containing aqueous solution is not able to leak out; the upper photos show the top of the clamped plastic disks with the filter and a drop of the (a) Ag-free or (b) Ag-containing solution on it; the corresponding bottoms of the disks are presented below demonstrating that the Ag-free solution went through the filter while the Ag-containing solution did not.

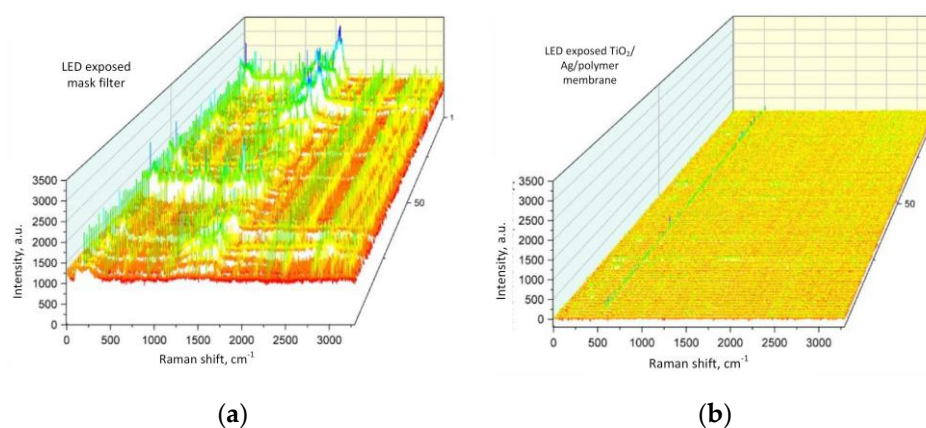

**Figure S4.** The results of SERS-analysis of air pulled out through the filtering materials before and after the LED exposure: arrays of the spectra collected on the SERS-active substrates installed after (a) the medical mask filter and (b) the TiO<sub>2</sub>/Ag/polymer membrane; z axis shows the number of the SERS-spectra registered during the SERS-active substrate mapping.
